# Supplementary material
Source: PubMed Central journal article supplement (PMC4996667)
Supplement: NIHMS745207-supplement-1.pdf [file NIHMS745207-supplement-1.pdf]

Supplemental Table 1: Categorization of Outcomes measured in included Atrazine studies

|                                                 |
|-------------------------------------------------|
| <b>1. Developmental Abnormalities/Mortality</b> |
| Abnormal development in the offspring           |
| Gonad abnormality                               |
| Left -to-right testis ratio                     |
| <b>2. Growth</b>                                |
| Fat body size                                   |
| Fish length                                     |
| Body length                                     |
| Growth length                                   |
| Length                                          |
| Smolt length                                    |
| Smolt weight                                    |
| Snout to vent length                            |
| Terminal body length                            |
| Mass of f2 larvae                               |
| Mass of versicolor tadpoles                     |
| 3 month growth rate in offspring                |
| Birth weight                                    |
| Larvae wet weight                               |
| ash free dry weight                             |
| larval period (days)                            |
| Percent survival metamorphosis                  |
| Proportion of tadpoles initiate metamorphosis   |

|                                                                     |
|---------------------------------------------------------------------|
| <b>3. Time to Developmental Landmark</b>                            |
| Number of days between cessation of treatment and first prooosterus |
| Time to metamorphosis                                               |
| age at metamorphosis                                                |
| age at preputial separation                                         |
| days to reach stage 66 of first larva                               |
| duration of time between maturity achievement                       |
| time to reach stage 42                                              |
| time to TR                                                          |
| <b>4. Organ weight / size</b>                                       |
| absolute testis weight                                              |
| Gonad surface area                                                  |
| anogenital index                                                    |
| Diameter of immature follicles                                      |
| Diameter of mature follicles                                        |
| Diameter: testis weight (ratio)                                     |
| Laryngeal muscle area                                               |
| Ovary weight                                                        |
| Oviduct weight                                                      |
| Prostate weight                                                     |
| Ratio of testis to body weight                                      |
| Relative adrenal weight                                             |
| Seminal vesicle weight                                              |
| Uterus weight                                                       |

|                                                        |
|--------------------------------------------------------|
| Ventral prostate weight                                |
| Vesicle weight                                         |
| Hepatosomatic index                                    |
| Gonadal somatic index                                  |
| Breeding gland area                                    |
| <b>5. Developmental enzymes</b>                        |
| aromatase activity                                     |
| gonad aromatase                                        |
| mRNA of aromatase in brain                             |
| mRNA of luteinizing hormone in brain                   |
| mRNA of follicle stimulating hormone                   |
| <b>6. Reproductive hormones</b>                        |
| Circulating concentrations of estradiol                |
| Circulating concentrations of luteinizing hormone (LH) |
| Circulating concentrations of testosterone             |
| Estradiol concentration                                |
| Intratesticular testosterone concentration             |
| Plasma aldosterone                                     |
| Plasma corticosterone                                  |
| Plasma E2                                              |
| Plasma estradiol                                       |
| Plasma LH                                              |
| Plasma testosterone                                    |
| Serum androstenedione                                  |

|                                                   |
|---------------------------------------------------|
| Serum estradiol                                   |
| Serum estrone                                     |
| Serum prolactin                                   |
| Serum testosterone                                |
| Testicular estradiol                              |
| Testicular testosterone                           |
| <b>7. Reproductive ability</b>                    |
| Fecundity                                         |
| Fertility                                         |
| Fertilization rate                                |
| Hatch success                                     |
| Locomotion activity                               |
| Mass corrected number of eggs released per female |
| Molting period                                    |
| Number of mating attempts                         |
| Abnormal sperm rate                               |
| Daily sperm rate                                  |
| Daily sperm/testes                                |
| Sperm motility                                    |
| Sperm / area                                      |
| Number of eggs                                    |
| Number of embryos                                 |
| Number of offspring                               |
| Number of spawns                                  |

|                                            |
|--------------------------------------------|
| Number of testicular ovarian follicles     |
| Display of courtship                       |
| Number of implantations                    |
| Percent adult emergence                    |
| Percent hatch of eggs                      |
| Percent postimplant loss                   |
| Percent preimplant loss                    |
| Rate of travel                             |
| Resting spermatogonia                      |
| Seminiferous tubule diameter               |
| Sex ratio                                  |
| Spermatids                                 |
| Spermatogonia                              |
| Percent survival in different frog species |
| Swimming speed                             |
| Total offspring                            |
| Dead sperm                                 |
| Epidymal sperm number                      |
| Number of corpora lutea                    |

Supplemental Table 2: Outcome Groups and Direction of Harm

| <b>HARMFUL DIRECTION-<br/>INCREASE</b>                       | <b>HARMFUL DIRECTION-<br/>DECREASE</b> |
|--------------------------------------------------------------|----------------------------------------|
| <b>Developmental Abnormalities/Mortality</b>                 |                                        |
| Abnormal development – in the offspring                      | -                                      |
| Gonad abnormality                                            | -                                      |
| <b>Time to Developmental Landmark</b>                        |                                        |
| Number of days between cessation of tx and first prooosterus | -                                      |
| Time to metamorphosis                                        | -                                      |
| age at metamorph                                             | -                                      |
| age at preputial separation                                  | -                                      |
| days to reach stage 66 of first larva                        | -                                      |
| duration of time between maturity achievement                | -                                      |
| time to reach stage 42                                       | -                                      |
| time to TR                                                   | -                                      |
| <b>Organ weight / size</b>                                   |                                        |
| Diameter of immature follicles                               | absolute testis weight                 |
| Diameter of mature follicles                                 | Gonad surface area                     |
| Relative adrenal weight                                      | anogenital index                       |
| Hepatosomatic index                                          | Diameter: testis weight (ratio)        |
| -                                                            | Laryngeal muscle area                  |

|                                         |                                                        |
|-----------------------------------------|--------------------------------------------------------|
| -                                       | Ovary weight                                           |
| -                                       | Oviduct weight                                         |
| -                                       | Prostate weight                                        |
| -                                       | Ratio of testis to body weight                         |
| -                                       | Seminal vesicle weight                                 |
| -                                       | Uterus weight                                          |
| -                                       | Ventral prostate weight                                |
| -                                       | Vesicle weight                                         |
| -                                       | Gonadal somatic index                                  |
| -                                       | Breeding gland area                                    |
| <b>Reproductive hormones</b>            |                                                        |
| Circulating concentrations of estradiol | Circulating concentrations of luteinizing hormone (LH) |
| Estradiol concentration                 | Circulating concentrations of testosterone             |
| plasma corticosterone                   | Intratesticular testosterone concentration             |
| plasma E2                               | plasma aldosterone                                     |
| plasma estradiol                        | plasma LH                                              |
| serum estradiol                         | plasma testosterone                                    |
| serum estrone                           | serum testosterone                                     |
| testicular estradiol                    | testicular testosterone                                |
| <b>Reproductive ability</b>             |                                                        |
| Molting period                          | Fecundity                                              |
| Abnormal sperm rate                     | Fertility                                              |

|                                        |                                                   |
|----------------------------------------|---------------------------------------------------|
| Number of testicular ovarian follicles | Fertilization rate                                |
| Percent postimplant loss               | Hatch success                                     |
| Percent preimplant loss                | Locomotion activity                               |
| Dead sperm                             | Mass corrected number of eggs released per female |
| -                                      | Number of mating attempts                         |
| -                                      | Daily sperm rate                                  |
| -                                      | Daily sperm/testes                                |
| -                                      | Sperm motility                                    |
| -                                      | Sperm / area                                      |
| -                                      | Number of eggs                                    |
| -                                      | Number of embryos                                 |
| -                                      | Number of offspring                               |
| -                                      | Number of spawns                                  |
| -                                      | Display of courtship                              |
| -                                      | Number of implantations                           |
| -                                      | Percent adult emergence                           |
| -                                      | Percent hatch of eggs                             |
| -                                      | Rate of travel                                    |
| -                                      | Resting spermatogonia                             |
| -                                      | Seminiferous tubule diameter                      |
| -                                      | Spermatids                                        |
| -                                      | Spermatogonia                                     |
| -                                      | Swimming speed                                    |



|                              |                                           |
|------------------------------|-------------------------------------------|
| -                            | Total offspring                           |
| -                            | Epidymal sperm number                     |
| <b>Growth</b>                |                                           |
| -                            | Fat body size                             |
| -                            | Fish length                               |
| -                            | Body length                               |
| -                            | Growth length                             |
| -                            | Length                                    |
| -                            | Smolt length                              |
| -                            | Smolt weight                              |
| -                            | Snout to vent length                      |
| -                            | Terminal body length                      |
| -                            | Mass of f2 larvae                         |
| -                            | Mass of versicolor tadpoles               |
| -                            | 3 month growth rate – in offspring        |
| -                            | Birth weight                              |
| -                            | Larvae wet weight                         |
| -                            | ash free dry weight                       |
| -                            | larval period (days)                      |
| -                            | Percent survival metamorph                |
| -                            | Proportion of tadpoles initiate metamorph |
| <b>Developmental enzymes</b> |                                           |
| -                            | aromatase activity                        |

|   |                                      |
|---|--------------------------------------|
| - | gonad aromatase                      |
| - | mRNA of aromatase in brain           |
| - | mRNA of luteinizing hormone in brain |
| - | mRNA of follicle stimulating hormone |
